# Supplementary material
Source: PubMed Central journal article supplement (PMC3961145)
Supplement: NIHMS562409-supplement-Supporting_Data.pdf [file NIHMS562409-supplement-Supporting_Data.pdf]

| Species (common name)                             | $\alpha$ 2 helix of CD1d    | NCBI accession /<br>Ensembl protein ID |                                       |
|---------------------------------------------------|-----------------------------|----------------------------------------|---------------------------------------|
| <i>Homo sapiens</i> (human)                       | LNQDK- <u>W</u> -TRETQVWLL  | AAA59673.1                             | ↑<br>Old-world<br>monkeys<br>and apes |
| <i>Pan troglodytes</i> (chimpanzee)               | LNQDK- <u>W</u> -TRETQVWLL  | BAE16552.2                             |                                       |
| <i>Pongo abelii</i> (orang-utan)                  | LNQDK- <u>W</u> -TRETQVWLL  | ENSPPYP00000000793                     |                                       |
| <i>Nomascus leucogenys</i> (gibbon)               | LNQDK- <u>W</u> -TRETQVWLL  | XP_003258696.1                         |                                       |
| <i>Macaca mulatta</i> (rhesus macaque)            | LNQDN- <u>W</u> -TKETQVWLL  | BAE16472.1                             |                                       |
| <i>Chlorocebus aethiops</i> (green monkey)        | LNQDK- <u>W</u> -TRETQVWLL  | BAE16549.1                             |                                       |
| <i>Callithrix jacchus</i> (marmoset)              | LNQHQ- <u>G</u> -TKETVHWLL  | ENSCJAP00000035312                     |                                       |
| <i>Otolemur garnetti</i> (small-eared galago)     | LNKDQ- <u>G</u> -TRETQVWLL  | ENSOGAP00000000115                     |                                       |
| <i>Microcebus murinus</i> (grey mouse lemur)      | LNQDQ- <u>G</u> -TRETQVWLL  | ENSMICP000000005201                    |                                       |
| <i>Tupaia belangeri</i> (Northern treeshrew)      | LNQDR- <u>G</u> -TKEMLQELL  | ACL35308.1                             |                                       |
| <i>Sorex araneus</i> (European shrew)             | INQDR- <u>G</u> -TSETQVWLL  | ENSSARG00000000647                     |                                       |
| <i>Cavia porcellus</i> (guinea pig)               | LNKDR- <u>G</u> -TREMVSLL   | ACN18275.1                             |                                       |
| <i>Mus musculus</i> (mouse)                       | LNADQ- <u>G</u> -TSATVQMLL  | NP_031665.2                            |                                       |
| <i>Rattus norvegicus</i> (rat)                    | LNADQ- <u>G</u> -TRETQVILL  | NP_058775.1                            |                                       |
| <i>Oryctolagus cuniculus</i> (rabbit)             | LNLDH- <u>G</u> -TREMIEELL  | ACN18276.1                             |                                       |
| <i>Spermophilus tridecemlineatus</i> (squirrel)   | LNQDK- <u>G</u> -TKETMQWLL  | ENSSTOP000000009436                    |                                       |
| <i>Marmota monax</i> (groundhog)                  | LNQDE- <u>G</u> -TKETQVWLL  | ABU40144.1                             |                                       |
| <i>Myotis lucifugus</i> (little brown bat)        | LNKDQ- <u>Y</u> -TRDTLEWLL  | ENSMLUP00000011966                     |                                       |
| <i>Sus scrofa</i> (pig)                           | LNEDQ- <u>G</u> -TKETQVWLL  | NP_001096150.2                         |                                       |
| <i>Bos taurus</i> (cow) <sup>1</sup>              | LNQDQ- <u>G</u> -TKETVHWLL  | NP_001192310.1                         |                                       |
| <i>Ovis aries</i> (sheep) <sup>1</sup>            | LNEDQ- <u>G</u> -TKETVHWLL  | NP_001116473.1                         |                                       |
| <i>Equus caballus</i> (horse)                     | LNDDQ- <u>G</u> -TREMVSLL   | ACN18274.1                             |                                       |
| <i>Felis catus</i> (domestic cat)                 | LNEDQ- <u>G</u> -TRKTLQLLL  | ENSFCAG00000012532                     |                                       |
| <i>Ailuropoda melanoleuca</i> (giant panda)       | LNQDQ- <u>G</u> -TRKTLQSL   | ENSAMEP00000004765                     |                                       |
| <i>Loxodonta africana</i> (African elephant)      | LNLDQ- <u>G</u> -TKETVQSL   | ACN18273.1                             |                                       |
| <i>Procavia capensis</i> (hyrax)                  | LNKDK- <u>G</u> -TREMVSLL   | ENSPCAP00000000930                     |                                       |
| <i>Echinops telfairi</i> (lesser hedgehog tenfec) | LNQDE- <u>V</u> -TTEMAQHLL  | ENSETEG00000015412                     |                                       |
| <i>Dasyus novemcinctus</i> (armadillo)            | LNQDQ- <u>G</u> -TLEIVQWLL  | ENSDNOP00000014509                     |                                       |
| <i>Isodon macrourus</i> (bandicoot) <sup>2</sup>  | LNQDE- <u>G</u> -TRLMLQSL   | ABI99485.1                             |                                       |
| <i>Gallus gallus</i> (chicken) <sup>2</sup>       | LMANA- <u>S</u> -TLNEVIQVLL | NP_001017412.1                         |                                       |

**Supporting Information Figure 1.** Alignment of  $\alpha$ 2-helix forming amino acids of published CD1d sequences, showing conservation of W155 in catarrhines (apes and Old World monkeys) and of G153 in nearly all other species. 1. Pseudogene. 2. CD1 protein, but not orthologous to any specific eutherian isoform.

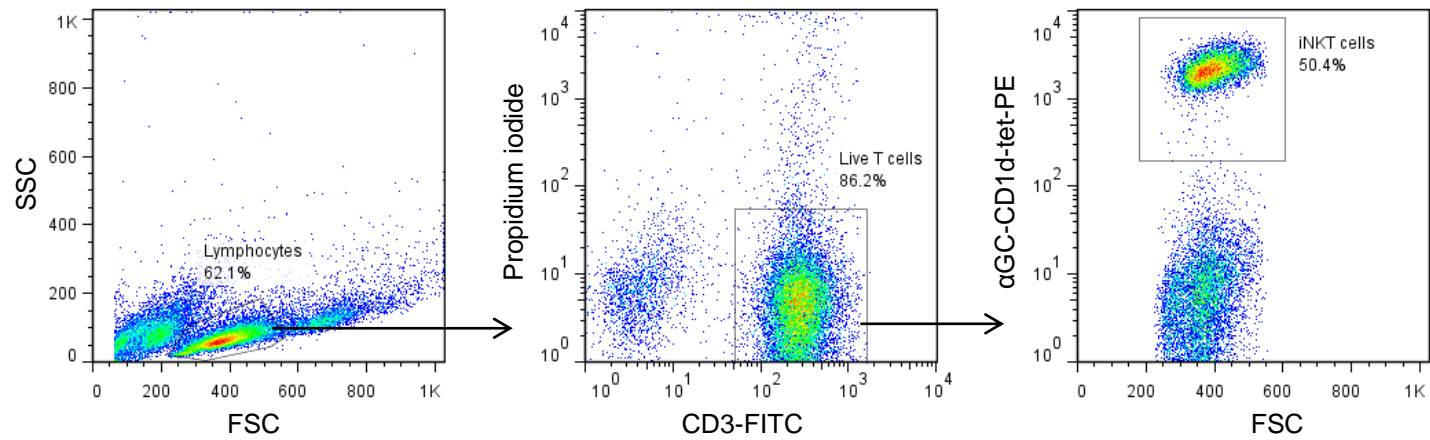

**Supporting Information Figure 2.** Gating strategy for enumeration of iNKT populations in lipid-treated PBMC cultures (as used for generating data shown in figure 1a). Shown is an example of a KRN7000 stimulated in vitro culture: Forward/side scatter characteristics were used to define region 1 (R1) containing lymphocytes (left density plot). Propidium iodide exclusion and staining with FITC-conjugated anti-CD3 antibody were used to define region 2 (R2), and from this live T lymphocytes were identified by gating cells on (R1+R2)(middle density plot), and live iNKT cells were identified as  $\alpha$ GC-CD1d tetramer positive cells in gate(R1+R2) (right density plot). All flow cytometry data were acquired on a BD FACSCalibur, and data were analysed using CellQuest Pro software.
